# Supplementary material for: Kv3.1 and Kv3.4, Are Involved in Cancer Cell Migration and Invasion
Source: PubMed Central journal article supplement (PMC5979479; doi:10.3390/ijms19041061), 2018-04-02

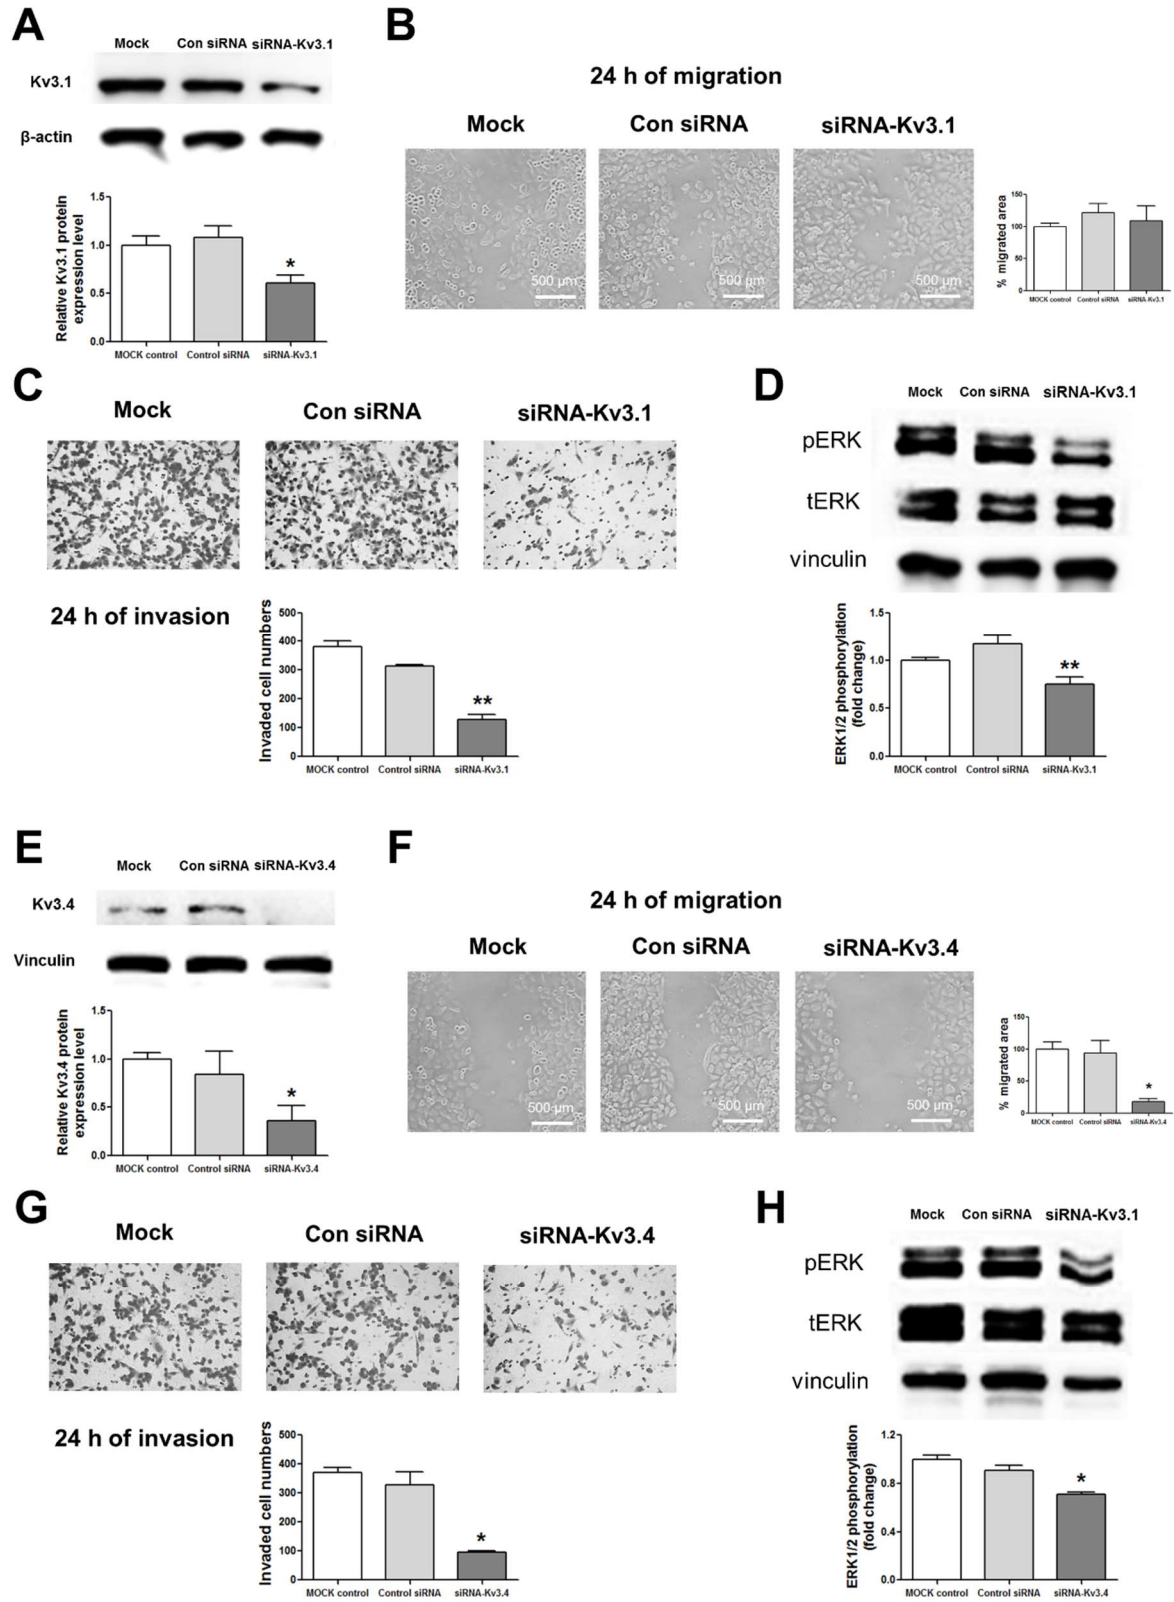

Supplement: ijms-19-01061-s001.pdf [file ijms-19-01061-s001.pdf]
